# Supplementary material for: Genetically-Guided Medical Nutrition Therapy in Type 2 Diabetes Mellitus and Pre-diabetes: A Series of n-of-1 Superiority Trials
Source: Frontiers journal article supplement (doi:10.3389/fnut.2022.772243), 2022-02-21
Supplement: Image_1.pdf [file Image_1.pdf]

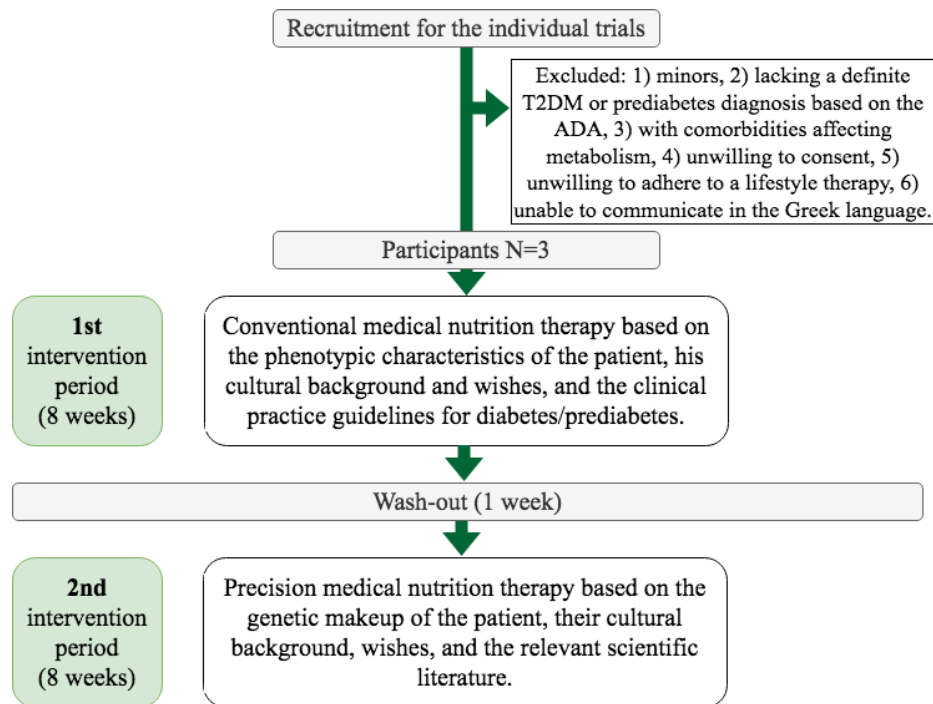

**Supplementary Figure 1.** Flowchart of the study process; ADA: *American Diabetes Association*; T2DM: *Type 2 diabetes mellitus*.
